# Supplementary material
Source: PubMed Central journal article supplement (PMC7485120)

**Figure S2: Boxplots of the gene signature scores in the datasets used to derive the gene signatures. (A-E)** Boxplots of the signature score for each gene signature of interest detailed in the Supplementary Methods in the datasets in which the gene signature was derived.

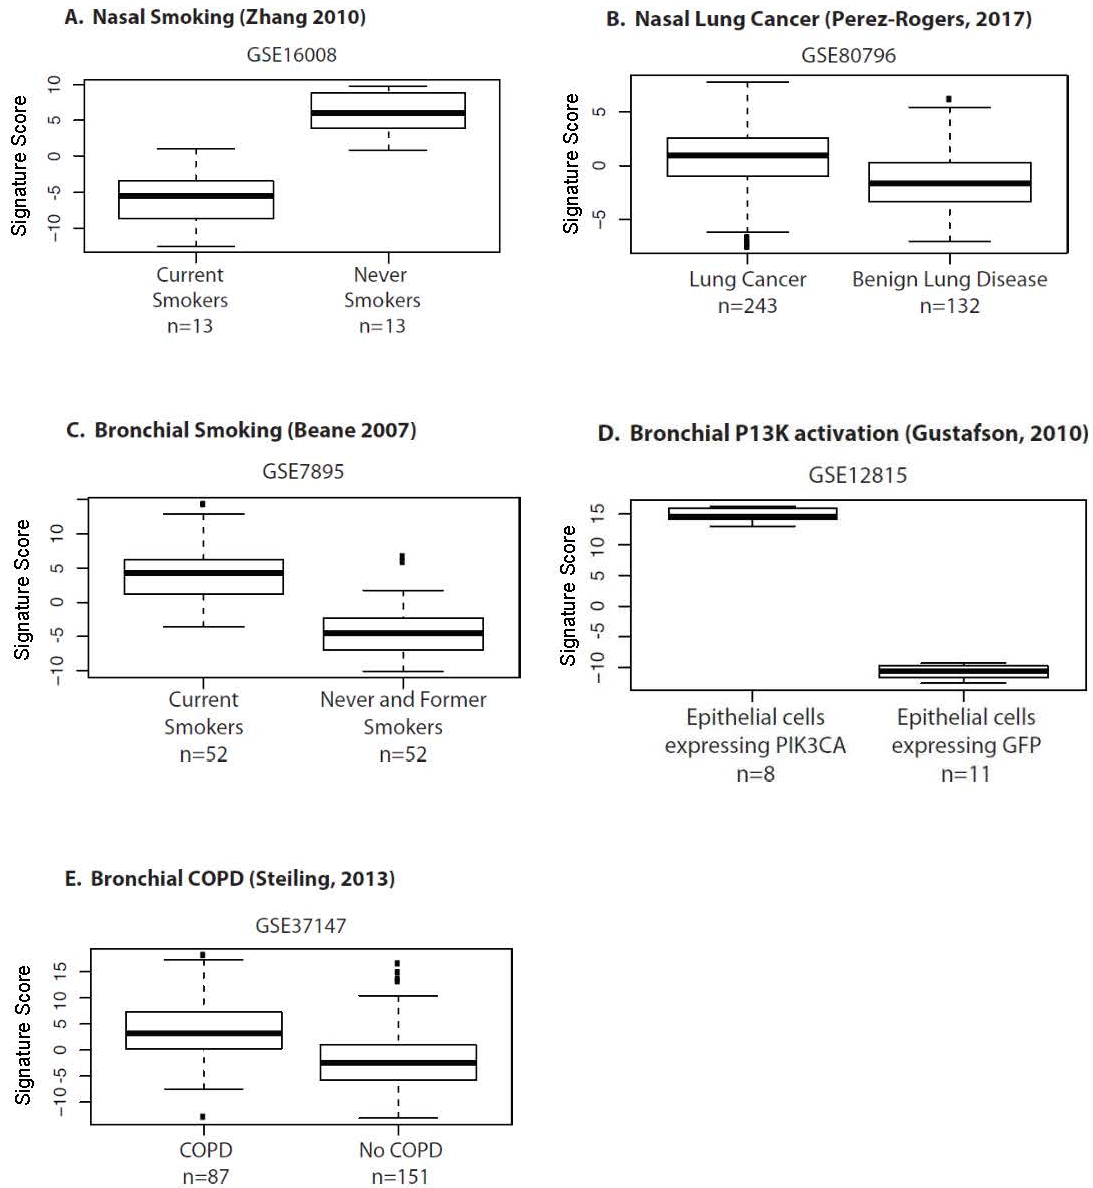

Supplement: NIHMS1538343-supplement-3.pdf [file NIHMS1538343-supplement-3.pdf]
